# Supplementary material for: Genotype-phenotype relationship in a large cohort of osteogenesis imperfecta patients with COL1A1 mutations revealed by a new scoring system
Source: PubMed Central journal article supplement — Chin Med J (Engl). 2019 Jan 7;132(2):145–53. doi: 10.1097/CM9.0000000000000013 (PMC6365277; doi:10.1097/cm9.0000000000000013), 2019-01-07
Supplement: cm9-132-145-s001.pdf [file cm9-132-145-s001.pdf]

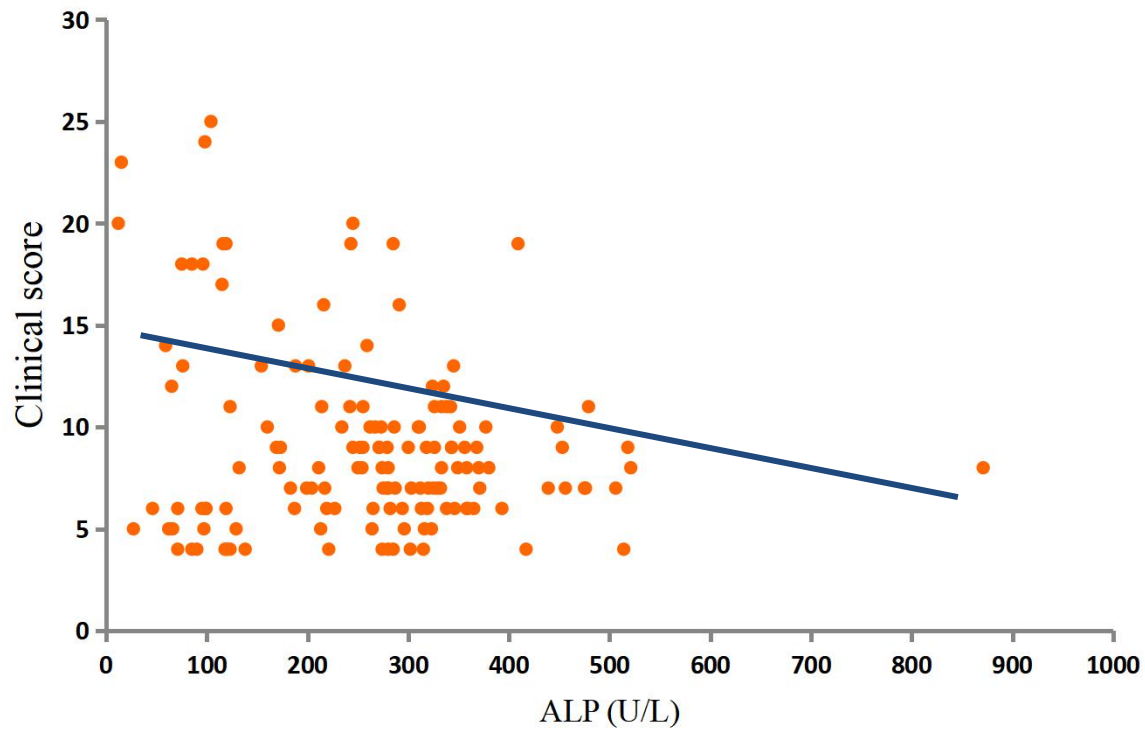

Supplement Figure 1. Correlation of serum ALP levels and clinical score of OI. After adjusted for age and gender, the serum ALP level was negatively correlated to clinical score of OI.  $Y = -0.013x + 14.0$  ( $P < 0.001$ )

A

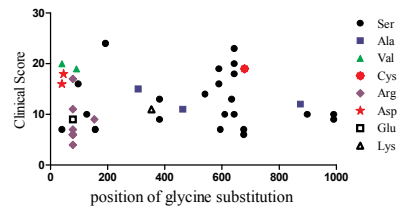

B

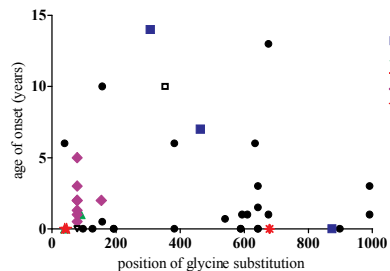

C

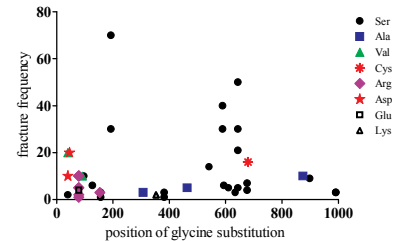

D

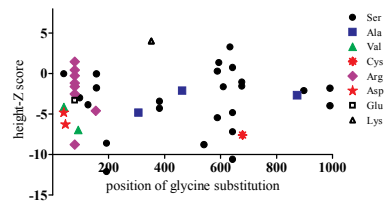

E

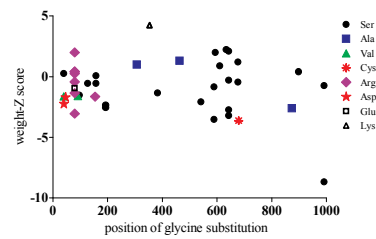

F

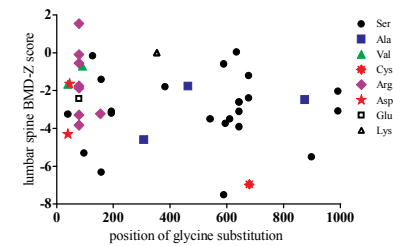

G

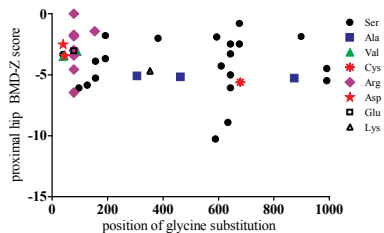

H

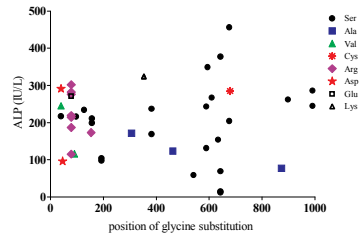

I

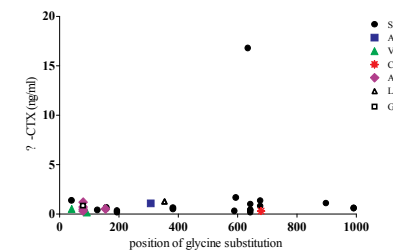

Supplement Figure 2. Relationships between the positions of glycine substitutions in collagen type I  $\alpha$  1 chains and phenotype.

A. Relationship between the positions of glycine substitutions in collagen type I  $\alpha$  1 chains and clinical score.

B. Relationship between the positions of glycine substitutions in collagen type I  $\alpha$  1 chains and age of onset.

C. Relationship between the positions of glycine substitutions in collagen type I  $\alpha$  1 chains and fracture frequency.

D. Relationship between the positions of glycine substitutions in collagen type I  $\alpha$  1 chains and height-Z score.

E. Relationship between the positions of glycine substitutions in collagen type I  $\alpha$  1 chains and weight-Z score.

F. Relationship between the positions of glycine substitutions in collagen type I  $\alpha$  1 chains and lumbar spine BMD-Z score.

G. Relationship between the positions of glycine substitutions in collagen type I  $\alpha$  1 chains and proximal hip BMD-Z score.

H. Relationship between the positions of glycine substitutions in collagen type I  $\alpha$  1 chains and ALP levels.

I. Relationship between the positions of glycine substitutions in collagen type I  $\alpha$  1 chains and  $\beta$ -CTX levels.

-Supplemental Table 1. List of primers for PCR amplification of exons of *COL1A1*

| Exon   | Primer sequence (5' → 3')                                       | Length (bp) | Annealing Tm (°C) |
|--------|-----------------------------------------------------------------|-------------|-------------------|
| E1     | Forward: CCTGCTCTCCATCAGGACA<br>Reverse: GGATCATCCACGTCTCGTTT   | 365         | 60                |
| E2-3   | Forward: GGGGAAAGGTGGTTAAGCTG<br>Reverse: GGGGGAGAAGAAACAAGAGG  | 550         | 60.5              |
| E4-5   | Forward: GGAGCAGCATTAGCAAACCT<br>Reverse: CACAAACTGTGAAGGGTATGT | 567         | 60                |
| E6     | Forward: CACCAGGAAGTGCATGATGT<br>Reverse: CTTCTGTCATCCATGCTCCC  | 202         | 60                |
| E7-8   | Forward: AGTCCAGAAAGGATGCAGGA<br>Reverse: CAGGCCTGGGAGTTCTTCTA  | 444         | 59.5              |
| E9     | Forward: CCTGGGGTCTTCCTTACCTC<br>Reverse: GTTCCCAAATGTGGTGGAGT  | 234         | 60                |
| E10    | Forward: AACCTGACCTGCAACAATCC<br>Reverse: GGACTTGGGGAGCTTAAATG  | 368         | 60                |
| E11    | Forward: TGGGTCCACAGTGATGTGTT<br>Reverse: GGAAGAGGTTGGGACTGGAT  | 181         | 60                |
| E12    | Forward: AGGTGGATGTCAAGGCTGTT<br>Reverse: TCATTCATGGTGGGACTCTG  | 178         | 59.5              |
| E13-15 | Forward: AGGTGGATGTCAAGGCTGTT<br>Reverse: TCATTCATGGTGGGACTCTG  | 551         | 60                |
| E16    | Forward: AACCCAGGACTTCCTCTGT<br>Reverse: GGGAACAGGGAGACATGAAC   | 204         | 59.5              |

|        |                                                                 |     |      |
|--------|-----------------------------------------------------------------|-----|------|
| E17    | Forward: CTGTCCCTGTCTCCCCTTC<br>Reverse: CAGGCAAGGACTCTGAGGTT   | 248 | 59.5 |
| E18    | Forward: GTCCCCGACTCAGTGTCC<br>Reverse: CCTGCTCCCCAGATGAGAG     | 400 | 60   |
| E19    | Forward: CCCTTTCCCTCTGCTCCTA<br>Reverse: GTCTTCCTGCTCCCCAGAT    | 225 | 59   |
| E20    | Forward: ATCTGGGGAGCAGGAAGAC<br>Reverse: AGTGA ACTCCGCGACACAC   | 528 | 60   |
| E21    | Forward: AGGAACCCCTGACACTGGAG<br>Reverse: AGTGA ACTCCGCGACACAC  | 281 | 61   |
| E22-24 | Forward: CTCATTGCCTGGCTGGTG<br>Reverse: AAAGCAGCAGTGAGGACAGC    | 627 | 61   |
| E25    | Forward: AAGTATCACTCCCCCTGAACC<br>Reverse: AGCCCAGGACTCCTTCAAGT | 255 | 59.5 |
| E26-29 | Forward: GGGCCAAACAGTCTTTTGAA<br>Reverse: CTCTGGATTCCCTGCATCTC  | 745 | 60   |
| E30    | Forward: CGTGCTTTCCAGCAGAGTG<br>Reverse: GCACCTTGACGGATGCAG     | 150 | 60   |
| E31-32 | Forward: CGTACTTGGCCCTATCTCCA<br>Reverse: GATTCAAAGCAGGCAGAGATG | 622 | 60   |
| E33    | Forward: CCTCTCAGGAAACCCAGACA<br>Reverse: CCTGCTGAGGAGGCTATGTG  | 248 | 60.5 |
| E34-35 | Forward: GCTCTCCTGGGGTCATCTACT<br>Reverse: CTGACGCCTTTGTCCTCATT | 425 | 60   |
| E36-38 | Forward: TTCCTGCCTCCATTACTGCT<br>Reverse: ATGAGGATAGGAGGGGCTGT  | 651 | 60   |
| E39-40 | Forward: GACTGAGGACCCAATGATGC                                   | 543 | 60   |

|        |                                   |      |      |
|--------|-----------------------------------|------|------|
|        | Reverse:<br>GAGTCCGCTGGAGTCATCTC  |      |      |
|        | Forward:<br>TGACTCCAGCGGACTCAAG   |      |      |
| E41-42 | Reverse:<br>GGAGAGCAGGGGAATATGG   | 432  | 60   |
|        | Forward:<br>GCAACACTCCATGACCACAG  |      |      |
| E43    | Reverse:<br>TTAAGGCCCTGACATCTTGC  | 342  | 60   |
|        | Forward:<br>GCCTGACAGTTTGTCCCTTTC |      |      |
| E44-45 | Reverse: GCTTGGGGCTCAGGAAG        | 571  | 60   |
|        | Forward:<br>GCCCTCAGGCTACATTTGAC  |      |      |
| E46-47 | Reverse:<br>CCTGCACAGAGAGGGAAGAG  | 676  | 60   |
|        | Forward:<br>CCTGTTGTATGTAGCCCCTCA |      |      |
| E48    | Reverse:<br>GAGTCAGGGAAAGGGAGCA   | 490  | 60   |
|        | Forward:<br>CTCCCTCCCTCCTACTCCTG  |      |      |
| E49    | Reverse:<br>GGCTAGCCCATCTCCTAACA  | 349  | 59.5 |
|        | Forward:<br>CTCCCTCCCTCCTACTCCTG  |      |      |
| E50    | Reverse:<br>TGTCCATCACCCCTTAGCAGA | 406  | 60   |
|        | Forward:<br>AGGCCATAGTGCCCTCTCTC  |      |      |
| E51(1) | Reverse:<br>CAGATTTGGGAAGGAGTGGA  | 631  | 60.5 |
|        | Forward:<br>ACTTGCTTGAAGACCCATGC  |      |      |
| E51(2) | Reverse:<br>CCCAACTCCAAAGAAGGAAA  | 1161 | 60   |
|        | Forward:<br>CCTCTCTCCATCACTCCCAC  |      |      |
| E52    | Reverse:<br>TCAGTTTGGGTTGCTTGTCTG | 287  | 60   |

Supplemental Table 2. Relationship between phenotypes and types of glycine substitutions in type I collagen

|                                   | Serine<br>(n=24)     | Othersubstitution<br>(n=18) | Statistical<br>values | P     |
|-----------------------------------|----------------------|-----------------------------|-----------------------|-------|
| Male                              | 19 (79.2)            | 12 (66.2)                   | 0.83*                 | 0.362 |
| Age of onset (years)              | 0.9 (0.0, 3.0)       | 1.2 (0.0, 3.5)              | 191.0                 | 0.512 |
| Age of visit (years)              | 10.0 (6.9, 18.5)     | 10.9 (5.0, 17.0)            | 211.0                 | 0.899 |
| OI types (I/II/III)               | 7/11/6               | 7/8/3                       | 0.63*                 | 0.730 |
| Blue sclera                       | 21 (87.5)            | 17 (94.4)                   | 0.58*                 | 0.448 |
| DI                                | 9 (39.1)             | 5 (27.83)                   | 0.58*                 | 0.447 |
| Hearing loss                      | 0 (0.0)              | 1 (5.6)                     | 1.37*                 | 0.243 |
| Ligament relaxation               | 14 (63.6)            | 12 (66.7)                   | 0.40*                 | 0.842 |
| Height Z score                    | -3.35 ± 3.87         | -3.10 ± 3.30                | -0.23                 | 0.821 |
| Weight Z score                    | -0.96 ± 2.36         | -0.61 ± 1.97                | -0.50                 | 0.619 |
| lumbar spine BMD Z score          | -3.03 ± 1.87         | -2.20 ± 1.99                | -1.34                 | 0.176 |
| proximal hip BMD Z score          | -4.26 ± 2.38         | -3.55 ± 1.69                | -1.06                 | 0.297 |
| Number of fractures               | 6 (3, 28)            | 8 (3, 10)                   | 199.5                 | 0.673 |
| Frequency of fractures (per year) | 1.2 (0.6, 2.2)       | 0.8 (0.5, 2.0)              | 172.5                 | 0.269 |
| Deformity of bone                 | 14 (58.3)            | 8 (44.4)                    | 0.80*                 | 0.372 |
| Wormian bones                     | 19 (79.2)            | 12 (75.0)                   | 0.10*                 | 0.757 |
| VCF                               | 14 (77.8)            | 12 (70.6)                   | 0.24*                 | 0.627 |
| Scoliosis                         | 8 (38.1)             | 5 (29.4)                    | 0.32*                 | 0.575 |
| Limited movement                  | 9 (39.1)             | 6 (33.3)                    | 0.15*                 | 0.702 |
| Clinical score                    | 12.9 ± 5.8           | 12.0 ± 5.2                  | 0.50                  | 0.636 |
| Ca (mmol/L)                       | 2.48 ± 0.11          | 2.44 ± 0.10                 | 1.28                  | 0.266 |
| P (mmol/L)                        | 1.57 ± 0.29          | 1.56 ± 0.26                 | 0.09                  | 0.772 |
| ALP (U/L)                         | 213 (110, 257)       | 216 (121, 283)              | 192.5                 | 0.550 |
| β-CTX (ng/ml)                     | 0.600 (0.400, 1.075) | 0.500 (0.300, 1.050)        | 100.0                 | 0.679 |
| 25OHD (ng/ml)                     | 18.8 ± 8.6           | 17.2 ± 9.1                  | <0.001                | 0.991 |
| PTH (pg/ml)                       | 22.7 (14.8, 34.2)    | 17.6 (11.8, 29.0)           | 98.0                  | 0.328 |
| ALT (U/L)                         | 14 (11, 20)          | 15 (11, 24)                 | 193.0                 | 0.771 |
| Cr (μmol/L)                       | 40 ± 16              | 40 ± 13                     | 0.10                  | 0.750 |

The data were shown as mean ± SD, median (Q1, Q3), or n (%).

\*χ<sup>2</sup>-value, †T value, or otherwise U value.

OI: Osteogenesis imperfecta, DI: dentinogenesis imperfecta; BMD: bone mineral density; VCF: vertebral compressive fractures; Ca: Serum calcium; P: Serum phosphate; ALP: alkaline phosphatase; β-CTX: β-isomerized carboxy-telopeptide of type I collagen; 25OHD: 25 hydroxy-vitamin D; PTH: parathyroid hormone; ALT: alanine aminotransferase; Cr: creatinine.
